# Supplementary material for: Characteristics of Artificial Intelligence Clinical Trials in the Field of Healthcare: A Cross-Sectional Study on ClinicalTrials.gov
Source: MDPI journal article supplement (doi:10.3390/ijerph192013691), 2022-10-21
Supplement: s1 [file s1]

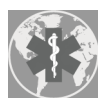

# Characteristics of artificial intelligence clinical trials in the field of healthcare: A Cross-Sectional Study on ClinicalTrials.gov

**Table S1.** Characteristics of completed interventional trials by the status of results reporting.

| Characteristics               | Number (%) of studies (N = 249) |                        |
|-------------------------------|---------------------------------|------------------------|
|                               | Reported (n = 27)               | Not reported (n = 222) |
| <b>Posted year</b>            |                                 |                        |
| Before 2007                   | 2 (7.41)                        | 4 (1.80)               |
| 2008-2012                     | 6 (22.22)                       | 18 (8.11)              |
| 2013-2017                     | 14 (51.85)                      | 57 (25.68)             |
| After 2018                    | 5 (18.52)                       | 143 (64.41)            |
| <b>Status</b>                 |                                 |                        |
| Completed                     | 22 (81.48)                      | 188 (84.68)            |
| Suspended                     | 0 (0)                           | 3 (1.35)               |
| Terminated                    | 5 (18.52)                       | 10 (4.50)              |
| Withdrawn                     | 0 (0)                           | 21 (9.46)              |
| <b>Allocation</b>             |                                 |                        |
| Randomized                    | 7 (25.93)                       | 114 (51.35)            |
| Non-randomized                | 3 (11.11)                       | 23 (10.36)             |
| NA                            | 17 (62.96)                      | 83 (37.39)             |
| <b>Masking</b>                |                                 |                        |
| None/open label               | 27 (100)                        | 143 (64.41)            |
| Single                        | 0 (0)                           | 46 (20.72)             |
| Double or more                | 0 (0)                           | 33 (14.86)             |
| <b>Phase</b>                  |                                 |                        |
| Phase 1                       | 0 (0)                           | 6 (2.70)               |
| Phase 1/Phase 2               | 1 (3.70)                        | 3 (1.35)               |
| Phase 2                       | 1 (3.70)                        | 5 (2.25)               |
| Phase 2/Phase 3               | 0 (0)                           | 1 (0.45)               |
| Phase 3                       | 1 (3.70)                        | 3 (1.35)               |
| Phase 4                       | 1 (3.70)                        | 6 (2.70)               |
| NA                            | 23 (85.19)                      | 198 (89.19)            |
| <b>Enrollment</b>             |                                 |                        |
| ≤100                          | 17 (62.96)                      | 134 (60.36)            |
| >100                          | 10 (37.04)                      | 88 (39.64)             |
| <b>Center</b>                 |                                 |                        |
| Single-center                 | 15 (55.56)                      | 194 (87.39)            |
| Multi-center                  | 12 (44.44)                      | 28 (12.61)             |
| <b>Lead sponsor</b>           |                                 |                        |
| Hospital/University           | 12 (44.44)                      | 132 (59.46)            |
| Industry                      | 8 (29.63)                       | 50 (22.52)             |
| Other                         | 7 (25.93)                       | 40 (18.02)             |
| <b>Region of lead sponsor</b> |                                 |                        |
| North America                 | 22 (81.48)                      | 109 (49.10)            |
| Europe                        | 3 (11.11)                       | 61 (27.48)             |

|                  |            |             |
|------------------|------------|-------------|
| Asia             | 1 (3.70)   | 47 (21.17)  |
| Other            | 1 (3.70)   | 5 (2.25)    |
| <b>Funded by</b> |            |             |
| NIH/US Fed       | 8 (29.63)  | 17 (7.66)   |
| Industry/other   | 19 (70.37) | 205 (92.34) |

Abbreviations: NA, not applicable; NIH, National Institutes of Health; US Fed, other United States Federal Agencies.

**Table S2.** Description of entity types in the AI technology application graph.

| Entity types       | Description                                       | Example                           |
|--------------------|---------------------------------------------------|-----------------------------------|
| AI_subdomain       | classification of AI subdomains                   | e.g., supervised machine learning |
| AI_technology      | detailed AI technologies of different subdomains  | e.g., support vector machine      |
| condition          | classification of conditions by ICD11             | e.g., neoplasms                   |
| healthcare_setting | classification of healthcare application settings | e.g., diagnosis and screening     |

**Table S3.** Description of entity relationship types in the AI technology application graph.

| Relationship types | Description                                            | Example                                                                     |
|--------------------|--------------------------------------------------------|-----------------------------------------------------------------------------|
| has_a              | AI subdomain contains detailed AI algorithms or models | e.g., <“supervised machine learning” -has_a - “support vector machine”>     |
| is_applied_to      | AI technology can be apply to the healthcare scenarios | e.g., <“support vector machine” -is_applied_to - “diagnosis and screening”> |
| focus_on           | focused disease areas in healthcare scenarios          | e.g., <“diagnosis and screening” -focus_on - “neoplasms”>                   |

**Table S4.** Statistics on the application of deep learning technology (list the top 10 items).

| Rank | AI technology | Healthcare setting      | Conditions                                                     | Number of trials |
|------|---------------|-------------------------|----------------------------------------------------------------|------------------|
| 1    | Deep learning | Diagnosis and screening | Neoplasms                                                      | 54               |
| 2    | Deep learning | Diagnosis and screening | Diseases of the digestive system                               | 20               |
| 3    | Deep learning | Diagnosis and screening | Diseases of the visual system                                  | 18               |
| 4    | Deep learning | Diagnosis and screening | Symptoms, signs or clinical findings, not elsewhere classified | 10               |
| 5    | Deep learning | Diagnosis and screening | Diseases of the circulatory system                             | 9                |
| 6    | Deep learning | Diagnosis and screening | Other conditions not classified                                | 9                |
| 7    | Deep learning | Diagnosis and screening | Diseases of the nervous system                                 | 7                |
| 8    | Deep learning | Diagnosis and screening | Endocrine, nutritional or metabolic diseases                   | 4                |
| 9    | Deep learning | Diagnosis and screening | Diseases of the genitourinary system                           | 4                |
| 10   | Deep learning | Diagnosis and screening | Mental, behavioural or neurodevelopmental                      | 3                |

---

disorders

---
